# Supplementary material for: Tree species composition along environmental and disturbance gradients in tropical sub-montane forests, Tanzania
Source: PubMed Central journal article supplement (PMC9994703; doi:10.1371/journal.pone.0282528), 2023-03-08
Supplement: pone.0282528.s001.pdf [file pone.0282528.s001.pdf]

**SI Appendix: List of dominant species in Sub-tropical forest of Eastern Arc montane forests.** The bolded species are indicator species with highest indicator values which were used for naming the communities in Sub-tropical East Usambara montane forest of Eastern Arc mountains, Tanzania. IVI = Importance value index and CCA1 and CCA2 = Canonical correspondence analysis showing values for species along axis 1 and 2.

| <i>Scientific names</i>                                          | <i>Species code</i> | <i>IVI</i>   | <i>CCA1</i>  | <i>CCA2</i>  | <i>Community type</i> | <i>Indicator value</i> |
|------------------------------------------------------------------|---------------------|--------------|--------------|--------------|-----------------------|------------------------|
| <i>Alangium chinense (Lour.) Harms</i>                           | <i>Al.ch</i>        | 9.50         | 0.40         | 0.79         | 2                     | 0.53                   |
| <i>Albizia gummifera (J.F.Gmel.) C.A.Sm.</i>                     | <i>Al.gu</i>        | 5.87         | -0.40        | -0.43        | 1                     | 0.43                   |
| <i>Allophylus melliodorus Gilg ex Radlk.</i>                     | <i>Al.me</i>        | 10.91        | 0.58         | 0.35         | 2                     | 0.48                   |
| <i>Allanblackia stuhlmannii (Engl.) Engl.</i>                    | <i>Al.st</i>        | 6.27         | 0.63         | 0.65         | 4                     | 0.58                   |
| <i>Alsodeiopsis schumannii (Engl.) Engl.</i>                     | <i>Al.sc</i>        | 64.46        | 1.09         | -0.35        | 4                     | 0.61                   |
| <i>Annickia kummeriae (Engl. &amp; Diels) Setten &amp; Maas</i>  | <i>An.ku</i>        | 7.27         | 0.52         | 0.78         | 2                     | 0.45                   |
| <i>Anthocleista grandiflora Gilg</i>                             | <i>An.gr</i>        | 8.61         | 0.75         | -0.18        | 4                     | 0.53                   |
| <i>Antidesma membranaceum Müll.Arg.</i>                          | <i>An.me</i>        | 5.91         | 0.05         | -0.11        | 4                     | 0.27                   |
| <i>Antiaris toxicaria Lesch.</i>                                 | <i>An.to</i>        | 10.66        | -1.01        | 0.11         | 1                     | 0.75                   |
| <b><i>Artocarpus heterophyllus Lam</i></b>                       | <b><i>Ar.he</i></b> | <b>18.54</b> | <b>-1.07</b> | <b>-0.79</b> | <b>3</b>              | <b>0.67</b>            |
| <i>Blighia unijugata Baker</i>                                   | <i>Bl.un</i>        | 95.24        | -0.73        | -0.11        | 1                     | 0.64                   |
| <i>Celtis gomphophylla Baker</i>                                 | <i>Ce.go</i>        | 7.79         | 0.10         | -0.17        | 2                     | 0.38                   |
| <i>Celtis mildbraedii Engl.</i>                                  | <i>Ce.mi</i>        | 9.77         | -1.35        | -0.11        | 3                     | 0.43                   |
| <i>Cephalosphaera usambarensis (Warb.) Warb.</i>                 | <i>Ce.us</i>        | 7.35         | 0.85         | -0.14        | 4                     | 0.76                   |
| <i>Chrysophyllum perpulchrum Mildbr. ex Hutch. &amp; Dalziel</i> | <i>Ch.pe</i>        | 8.13         | 0.23         | 0.65         | 2                     | 0.40                   |
| <i>Drypetes gerrardii Hutch.</i>                                 | <i>Dr.ge</i>        | 17.46        | 0.92         | -0.31        | 4                     | 0.57                   |

|                                                               |                     |               |              |              |          |             |
|---------------------------------------------------------------|---------------------|---------------|--------------|--------------|----------|-------------|
| <i>Englerodendron usambarense</i> Harms                       | <i>En.us</i>        | 47.28         | 0.97         | -0.42        | 4        | 0.47        |
| <i>Erythrophleum suaveolens</i> (Guill. & Perr.) Brenan       | <i>Er.su</i>        | 15.01         | -0.85        | 0.33         | 3        | 0.37        |
| <i>Ficus exasperata</i> Vahl                                  | <i>Fi.ex</i>        | 11.30         | -0.52        | -0.64        | 2        | 0.33        |
| <b><i>Ficus sur</i> Forssk.</b>                               | <b><i>Fi.su</i></b> | <b>114.63</b> | <b>0.17</b>  | <b>0.71</b>  | <b>2</b> | <b>0.70</b> |
| <i>Funtumia africana</i> (Benth.) Stapf                       | <i>Fu.af</i>        | 11.10         | -0.54        | -0.40        | 1        | 0.70        |
| <i>Greenwayodendron suaveolens</i> (Engl. & Diels) Verdc.     | <i>Gr.su</i>        | 10.79         | 0.89         | -0.18        | 4        | 0.59        |
| <b><i>Isoberlinia scheffleri</i> (Harms) Greenway</b>         | <b><i>Is.sc</i></b> | <b>8.85</b>   | <b>1.16</b>  | <b>-0.21</b> | <b>4</b> | <b>0.84</b> |
| <b><i>Lecaniodiscus fraxinifolia</i> Baker</b>                | <b><i>Le.fr</i></b> | <b>6.53</b>   | <b>-1.22</b> | <b>-0.16</b> | <b>3</b> | <b>0.64</b> |
| <b><i>Leptonychia usambarensis</i> K. Schum.</b>              | <b><i>Le.us</i></b> | <b>10.13</b>  | <b>-0.28</b> | <b>0.39</b>  | <b>1</b> | <b>0.92</b> |
| <i>Macaranga capensis</i> (Baill.) Sim                        | <i>Ma.ca</i>        | 9.95          | 0.92         | -1.24        | 2        | 0.54        |
| <i>Maesopsis eminii</i> Engl.                                 | <i>Ma.em</i>        | 7.69          | 0.31         | -0.60        | 4        | 0.63        |
| <i>Markhamia lutea</i> (Benth.) K.Schum.                      | <i>Ma.lu</i>        | 7.16          | -1.22        | -0.10        | 3        | 0.38        |
| <i>Mesogyne insignis</i> Engl.                                | <i>Me.in</i>        | 21.74         | 0.82         | 0.38         | 4        | 0.58        |
| <b><i>Myrianthus holstii</i> Engl.</b>                        | <b><i>My.ho</i></b> | <b>79.49</b>  | <b>0.71</b>  | <b>0.44</b>  | <b>2</b> | <b>0.62</b> |
| <i>Newtonia buchananii</i> (Baker)<br>G.C.C.Gilbert & Boutiqu | <i>Ne.bu</i>        | 12.40         | 0.94         | 0.04         | 4        | 0.66        |
| <i>Parinari excelsa</i> Sabine                                | <i>Pa.ex</i>        | 34.04         | 1.04         | -0.14        | 4        | 0.43        |
| <i>Pouteria alnifolia</i> (Baker) Roberty                     | <i>Po.al</i>        | 20.21         | -1.50        | 0.54         | 3        | 0.57        |
| <i>Quassia undulata</i> (Guill. & Perr.)<br>D.Dietr.          | <i>Qu.un</i>        | 151.76        | 0.40         | 0.52         | 2        | 0.36        |
| <i>Ricinodendron heudelotii</i> (Baill.) Heckel               | <i>Ri.he</i>        | 23.43         | -0.61        | 0.44         | 1        | 0.42        |
| <i>Rothmannia manganjae</i> (Hiern) Keay                      | <i>Ro.ma</i>        | 85.65         | -0.77        | -0.47        | 1        | 0.64        |

|                                                           |                     |              |              |              |          |             |
|-----------------------------------------------------------|---------------------|--------------|--------------|--------------|----------|-------------|
| <i>Shirakiopsis elliptica</i> (Hochst.) Esser             | <i>Sh.el</i>        | 6.05         | 0.27         | 0.10         | 4        | 0.36        |
| <b><i>Sorindeia madagascariensis</i> Thouars ex DC.</b>   | <b><i>So.ma</i></b> | <b>6.94</b>  | <b>0.44</b>  | <b>-0.34</b> | <b>4</b> | <b>0.77</b> |
| <i>Strombosia scheffleri</i> Engl.                        | <i>St.sc</i>        | 16.38        | 0.71         | 0.41         | 4        | 0.52        |
| <i>Synsepalum cerasiferum</i> (Welw.) T.D.Penn.           | <i>Sy.ce</i>        | 10.67        | 0.27         | 0.17         | 2        | 0.27        |
| <i>Synsepalum msolo</i> (Engl.) T.D.Penn.                 | <i>Sy.ms</i>        | 11.38        | -0.52        | -0.11        | 1        | 0.76        |
| <i>Tabernaemontana pachysiphon</i> Stapf                  | <i>Ta.pa</i>        | 52.80        | 0.50         | 0.36         | 2        | 0.47        |
| <b><i>Tabernaemontana ventricosa</i> Hochst. ex A.DC.</b> | <b><i>Ta.ve</i></b> | <b>29.60</b> | <b>-1.16</b> | <b>-0.44</b> | <b>1</b> | <b>0.94</b> |
| <i>Tarenna nigrescens</i> (Hook.f.) Hiern                 | <i>Ta.ni</i>        | 21.56        | 0.20         | 0.22         | 2        | 0.38        |
| <i>Trichilia dregeana</i> Sond.                           | <i>Tr.dr</i>        | 30.30        | 0.32         | 0.87         | 2        | 0.45        |
| <i>Trilepisium madagascariense</i> DC.                    | <i>Tr.ma</i>        | 7.16         | -0.99        | -0.23        | 1        | 0.57        |
| <i>Tricalysia myrtifolia</i> S.Moore                      | <i>Tr.my</i>        | 9.88         | -0.54        | -0.25        | 1        | 0.41        |
| <i>Xymalos monospora</i> (Harv.) Baill.                   | <i>Xy.mo</i>        | 20.90        | 0.93         | -0.10        | 4        | 0.48        |
